# Supplementary material for: Modulation of the fecal microbiome and metabolome by resistant dextrin ameliorates hepatic steatosis and mitochondrial abnormalities in mice
Source: Royal Society of Chemistry journal article supplement (doi:10.1039/d1fo00249j), 2021-01-01
Supplement: d1fo00249j1.xlsx [file d1fo00249j1.xlsx]

## Sheet: Sheet1
name	Name_des	Formula	Molecular Weight	RT [min]	ND.1	ND.2	ND.3	ND.4	ND.5	ND.6	HFD.1	HFD.2	HFD.3	HFD.4	HFD.5	HFD.6	HFID.1	HFID.2	HFID.3	HFID.4	HFID.5	HFID.6
Com_11_neg	Arachidonic acid	C20 H32 O2	304.24	13.778	1.93575e+10	8.86907e+09	1.88411e+10	2.57894e+10	2.13582e+10	2.22564e+10	1.7295e+10	2.42722e+10	4.2918e+10	3.19379e+10	3.0989e+10	3.82692e+10	3.70231e+09	2.35833e+09	5.07723e+09	5.84781e+09	1.06286e+10	19097781919
Com_12_pos	Allocholic acid	C24 H40 O5	408.287	12.519	1.81407e+10	5.47366e+09	1.01333e+10	1.69823e+10	1.98798e+10	1.94924e+10	1.03724e+10	29547308320	6.74499e+09	2.6155e+10	2.7258e+10	26892055967	8.5091e+09	9.42148e+09	6.91987e+09	2.66927e+10	1.81346e+10	3.07466e+10
Com_31_pos	Deoxycholic Acid	C24 H40 O4	392.292	13.862	13884754943	5.03567e+09	9.15981e+09	6.65314e+09	1.06902e+10	1.38739e+10	2.0943e+10	1.24085e+10	5.97033e+09	10303365558	8.69579e+09	8.79423e+09	6.01241e+09	9.1268e+09	1.06847e+10	8.3112e+09	5.59488e+09	1.38397e+10
Com_92_pos	Indole-3-acrylic acid	C11 H9 N O2	187.063	6.542	8.82546e+09	6.91654e+09	1.00495e+10	4.963e+09	5.33486e+09	3.4362e+09	2.03442e+09	1.76383e+09	1.39744e+09	1.87264e+09	1.59269e+09	1.20526e+09	2.32445e+09	4.00876e+09	3.35084e+09	2.59639e+09	3.25151e+09	2.58829e+09
Com_93_pos	Tryptophan	C11 H12 N2 O2	204.09	6.528	8.80825e+09	6.89746e+09	1.00193e+10	4.57457e+09	5.31846e+09	3.42854e+09	2.31828e+09	3.99709e+09	3.34247e+09	2.58974e+09	3.24017e+09	2.58335e+09	2.02869e+09	1.75792e+09	1.39496e+09	1.86725e+09	1.59043e+09	1.2035e+09
Com_53_neg	Pentadecanoic acid	C15 H30 O2	242.224	13.666	8.31019e+09	5.10821e+09	7.42049e+09	6.21574e+09	5.02625e+09	5.4583e+09	1.65073e+09	1.92249e+09	1.93984e+09	2.76906e+09	3.98222e+09	1.33561e+09	6.5682e+08	7.84567e+08	1.31515e+09	6.13005e+08	1.04965e+09	1.85067e+09
Com_174_pos	2-Hydroxycinnamic acid	C9 H8 O3	164.047	2.123	3.70385e+09	3.92771e+09	5.82939e+09	3.74436e+09	1.99027e+09	2.40348e+09	1.75671e+09	2.45132e+09	1.98504e+09	2.12157e+09	1.59685e+09	1.20425e+09	7.69086e+08	8.62966e+08	8.48158e+08	1.1776e+09	5.34972e+08	3.94163e+08
Com_79_neg	α-Eleostearic acid	C18 H30 O2	278.224	13.559	1.88695e+09	3.05617e+09	4.40325e+09	3.40294e+09	2.01707e+09	3.22275e+09	3.04346e+09	4.39227e+09	6.80767e+09	7.86839e+09	5.42156e+09	5.32338e+09	5.83877e+08	3.22288e+08	6.06077e+08	4.19634e+08	3.58902e+09	2.38617e+09
Com_212_pos	L-Tyrosine	C9 H11 N O3	181.074	2.128	2.99696e+09	3.14801e+09	4.78108e+09	3.11575e+09	1.61101e+09	2.00031e+09	1.44518e+09	1.87963e+09	1.62451e+09	1.79488e+09	1.26597e+09	1.02791e+09	5.97567e+08	6.70772e+08	6.65409e+08	9.21481e+08	4.03553e+08	3.02206e+08
Com_58_neg	Taurochenodeoxycholic acid	C26 H45 N O6 S	499.297	12.394	2.39065e+08	7.42747e+07	9.30776e+09	4.82195e+08	3.54381e+09	8.8674e+07	1.43178e+08	1.71377e+08	3.26855e+07	1.02139e+08	1.46669e+08	1.67524e+08	1.22499e+08	1.68291e+08	6.25414e+07	1.78005e+08	2.53501e+08	1.99535e+08
Com_297_neg	Stercobilin	C33 H46 N4 O6	594.342	10.024	1.06851e+09	1.25033e+09	6.25817e+08	5.8427e+08	6.69188e+08	1.39531e+09	3.99448e+08	3.24677e+08	6.86813e+08	3.53268e+08	6.84869e+08	7.91567e+08	1.73729e+08	1.82353e+08	1.4207e+08	1.46218e+08	1.31383e+08	1.13609e+08
Com_411_pos	Spermidine	C7 H19 N3	145.158	0.994	6.69081e+08	9.19196e+08	4.57978e+08	4.02649e+08	1.40665e+09	6.63187e+08	6.12489e+08	5.16768e+08	2.64991e+08	1.63527e+08	1.5353e+08	3.58524e+08	2.07931e+09	3.1701e+09	2.20282e+09	1.96684e+09	1.20878e+09	1.07855e+09
Com_148_pos	Methylmalonic Acid	C4 H6 O4	118.027	2.358	7.50489e+08	3.01495e+08	3.98925e+08	1.2495e+09	7.94734e+08	6.80358e+08	9.5975e+07	2.83982e+08	2.24483e+08	2.87487e+08	3.15757e+08	4.30814e+08	9.39373e+09	7.78258e+09	9.16945e+09	7.67992e+09	8.91723e+09	3.57669e+09
Com_129_neg	N-Acetylglucosamine	C8 H15 N O6	221.09	1.34	6.60593e+08	8.03545e+08	3.80696e+08	5.00712e+08	4.79902e+08	4.63922e+08	6.84024e+07	2.91116e+08	1.86371e+08	1.09354e+08	1.04286e+08	2.08198e+08	5.05708e+07	5.58245e+07	6.78264e+07	2.0138e+07	3.37953e+07	2.50793e+07
Com_1054_pos	β-Alanine	C3 H7 N O2	89.0477	1.488	5.11655e+08	5.98914e+08	7.23004e+08	3.622e+08	3.78256e+08	5.73724e+08	2.98188e+08	3.14559e+08	4.7599e+08	4.27553e+08	4.03061e+08	3.54127e+08	1.73296e+08	1.63933e+08	1.62423e+08	1.60173e+08	2.08222e+08	9.24109e+07
Com_670_neg	N-Methylthreonine	C5 H11 N O3	133.074	1.459	6.30127e+08	4.1883e+08	4.36038e+08	4.78405e+08	4.72336e+08	5.14844e+08	2.33843e+08	3.0704e+08	3.81212e+08	1.02365e+08	2.03952e+08	2.86352e+08	1.25449e+08	1.43552e+08	8.93849e+07	1.00109e+08	1.72007e+08	9.82945e+07
Com_1233_pos	5-Hydroxyindole-3-acetic acid	C10 H9 N O3	191.058	8.432	4.45742e+08	7.10089e+08	3.82893e+08	5.0224e+08	4.28938e+08	4.30392e+08	7.71686e+07	8.08901e+07	1.10311e+08	1.04589e+08	1.11839e+08	1.23916e+08	6.11337e+07	8.0726e+07	7.27376e+07	7.00918e+07	7.94257e+07	6.50843e+07
Com_572_neg	D-Phenylalanine	C9 H11 N O2	165.079	4.197	4.81449e+08	5.50817e+08	6.11816e+08	3.82094e+08	2.52558e+08	3.09034e+08	2.13943e+08	3.47463e+08	2.27364e+08	2.32313e+08	1.94337e+08	1.4548e+08	1.22632e+08	1.21058e+08	1.01529e+08	1.85019e+08	9.95451e+07	3.94296e+07
Com_1361_pos	2-Hydroxyphenylalanine	C9 H11 N O3	181.074	1.459	4.37963e+08	4.28112e+08	5.35049e+08	3.82611e+08	3.08568e+08	2.39027e+08	3.03236e+08	3.60737e+08	2.29724e+08	2.10483e+08	2.09025e+08	1.81821e+08	8.57271e+07	6.52041e+07	8.10387e+07	1.35667e+08	1.19931e+08	5.28202e+07
Com_1635_pos	β-Cortolone	C21 H34 O5	348.23	12.118	4.18328e+08	4.72743e+08	2.28555e+08	2.9858e+08	5.52544e+08	3.08005e+08	2.32566e+08	2.25155e+08	1.09259e+08	1.689e+08	1.76492e+08	1.60048e+08	8.86946e+07	1.38469e+08	1.53114e+08	1.38568e+08	6.7762e+07	1.09114e+08
Com_434_pos	Oleic acid	C18 H34 O2	282.256	14.41	1.95244e+08	2.17757e+08	1.59149e+08	5.44778e+08	4.30527e+08	6.5094e+08	1.65873e+09	2.183e+09	2.18976e+09	1.85762e+09	1.85869e+09	8.56635e+08	9.44566e+08	6.80182e+08	8.79424e+08	8.44013e+08	1.16828e+09	1.15075e+09
Com_595_neg	Calcitriol	C27 H44 O3	416.329	13.911	3.69733e+08	4.10932e+08	4.08521e+08	3.00569e+08	2.19149e+08	3.51443e+08	6.66038e+07	3.00246e+08	2.32995e+08	2.23852e+08	3.22436e+08	2.29492e+08	4.76864e+07	5.22689e+07	5.21255e+07	5.58782e+07	4.84467e+07	6.77484e+07
Com_1761_pos	8-Hydroxyquinoline	C9 H7 N O	145.053	8.431	2.77791e+08	4.91414e+08	2.58773e+08	3.46672e+08	2.86977e+08	2.68007e+08	4.6099e+07	3.62954e+07	9.03951e+07	4.96752e+07	7.98651e+07	8.46466e+07	3.7085e+07	4.80476e+07	4.76162e+07	4.12119e+07	4.18137e+07	3.76064e+07
Com_1682_pos	Glucosamine 6-phosphate	C6 H14 N O8 P	259.046	1.422	3.50954e+08	3.88331e+08	3.77901e+08	2.26285e+08	2.74401e+08	3.09731e+08	7.40046e+07	1.48093e+08	1.22493e+08	5.11059e+07	8.93798e+07	8.68321e+07	5.25269e+07	4.94903e+07	5.24252e+07	2.9863e+07	5.11049e+07	1.63648e+07
Com_941_pos	Indole	C8 H7 N	117.058	10.359	2.55519e+08	5.72863e+08	3.06761e+08	1.47738e+08	2.64599e+08	3.62095e+08	3.14441e+08	2.75679e+08	1.62666e+08	1.61518e+08	9.29586e+07	1.12322e+08	5.1379e+08	6.07774e+08	6.20034e+08	5.17697e+08	7.89375e+08	7.13771e+08
Com_362_neg	N-Acetylneuraminic acid	C11 H19 N O9	309.106	1.197	3.67949e+08	3.10186e+08	2.89153e+08	2.88297e+08	2.54616e+08	2.02534e+08	1.70679e+08	2.14037e+08	2.30806e+08	1.15187e+08	1.52441e+08	2.43686e+08	5.6463e+08	5.98546e+08	7.61128e+08	5.60035e+08	7.55694e+08	3.39345e+08
Com_799_neg	Tridecylic acid	C13 H26 O2	214.193	13.116	3.08667e+08	2.58504e+08	3.04712e+08	3.4576e+08	2.03975e+08	2.8185e+08	1.20416e+08	1.09657e+08	1.56979e+08	1.4985e+08	2.05407e+08	9.82455e+07	5.74905e+07	1.31497e+08	1.03182e+08	4.96086e+07	1.03582e+08	5.30288e+07
Com_1205_pos	Histamine	C5 H9 N3	111.08	1.156	2.03718e+08	4.81245e+08	1.74463e+08	3.96759e+08	1.77101e+08	6.0303e+07	2.2991e+07	1.94733e+07	6.2069e+06	8.98089e+06	1.21506e+07	6.83895e+06	6.37273e+07	5.77868e+07	9.90819e+07	6.123e+07	5.71617e+07	3.89491e+07
Com_687_neg	Glycocholic acid	C26 H43 N O6	465.309	11.9	2.25049e+08	8.14402e+07	4.97005e+08	2.09085e+08	1.77577e+08	1.89984e+08	7.86035e+07	1.35986e+08	1.00595e+08	3.313e+07	9.16937e+07	5.11616e+07	4.05525e+07	4.82764e+07	3.22936e+07	2.98707e+07	2.6331e+07	5.0087e+07
Com_687_neg	Glycocholic acid	C26 H43 N O6	465.309	11.9	2.25049e+08	8.14402e+07	4.97005e+08	2.09085e+08	1.77577e+08	1.89984e+08	7.86035e+07	1.35986e+08	1.00595e+08	3.313e+07	9.16937e+07	5.11616e+07	4.05525e+07	4.82764e+07	3.22936e+07	2.98707e+07	2.6331e+07	5.0087e+07
Com_2372_pos	4-Phenylbutyric acid	C10 H12 O2	164.084	15.122	2.20797e+08	2.30002e+08	2.25146e+08	2.01934e+08	2.44471e+08	2.06194e+08	1.61433e+07	2.91263e+07	4.65325e+07	5.34522e+07	4.7846e+07	3.20193e+07	1.97258e+07	1.69989e+07	2.04376e+07	2.49317e+07	2.15032e+07	3.58158e+07
Com_1283_pos	Dehydrocholic acid	C24 H34 O5	402.24	11.219	6.11704e+08	1.88202e+08	2.33793e+08	1.25721e+08	7.07797e+07	8.72958e+07	5.62909e+07	7.5532e+07	1.80906e+08	9.91085e+07	1.07767e+08	1.4283e+08	8.78726e+07	9.27991e+07	8.94282e+07	8.67904e+07	8.658e+07	1.01007e+08
Com_1027_neg	Urethane	C3 H7 N O2	89.0477	1.449	2.2147e+08	2.47271e+08	2.82046e+08	2.0324e+08	1.27652e+08	2.32496e+08	1.30168e+08	1.26612e+08	1.57166e+08	1.48892e+08	1.40454e+08	1.35064e+08	1.03957e+08	8.68249e+07	8.41617e+07	8.72858e+07	9.96081e+07	4.15914e+07
Com_1304_neg	N-Methyl-a-aminoisobutyric acid	C5 H11 N O2	117.079	1.818	2.20871e+08	2.67994e+08	2.06526e+08	1.74942e+08	1.56042e+08	1.9691e+08	1.78711e+08	1.92618e+08	1.39313e+08	1.37165e+08	1.30395e+08	1.2995e+08	1.16699e+08	1.15392e+08	9.98638e+07	1.34713e+08	1.1393e+08	5.52967e+07
Com_2058_pos	Indole-3-acetic acid	C10 H9 N O2	175.063	9.526	1.47984e+08	3.00596e+08	1.3245e+08	2.58484e+08	1.74646e+08	1.67177e+08	2.30823e+07	6.47915e+07	8.74692e+07	4.33933e+07	6.39618e+07	7.7228e+07	1.07357e+08	4.94764e+07	5.83071e+07	4.26385e+07	4.58103e+07	4.87216e+07
Com_1174_neg	Cannabigerolic acid	C22 H32 O4	360.23	12.299	1.59068e+08	1.99839e+08	1.70521e+08	1.13266e+08	1.98567e+08	2.41585e+08	1.30063e+08	1.366e+08	5.44001e+07	6.44278e+07	1.38704e+08	8.10614e+07	4.13723e+06	1.18406e+07	7.61061e+06	4.27834e+06	6.61304e+06	1.22952e+07
Com_1221_neg	Indole-5-Carboxylic Acid	C9 H7 N O2	161.048	1.439	1.70321e+08	2.95468e+08	7.98171e+07	1.50752e+08	2.00353e+08	1.86024e+08	2.44231e+07	3.25276e+07	2.76359e+07	2.14286e+07	3.24798e+07	3.34776e+07	8.62051e+07	5.14176e+07	7.21628e+07	3.91438e+07	6.87365e+07	6.34504e+07
Com_2830_pos	Linalool	C10 H18 O	154.136	14.062	2.22632e+08	1.52124e+08	2.04424e+08	1.47125e+08	2.85906e+08	6.44763e+07	1.64702e+07	2.6016e+07	1.53977e+07	2.03348e+07	2.18324e+07	1.7019e+07	2.41126e+07	3.64354e+07	3.33211e+07	3.33775e+07	3.95186e+07	3.67022e+07
Com_548_neg	Glycochenodeoxycholic Acid	C26 H43 N O5	449.312	11.658	1.24223e+08	1.49703e+07	6.55608e+08	7.95056e+07	1.1373e+07	4.02451e+07	1.10187e+08	5.41186e+07	4.26734e+07	5.04663e+07	4.20819e+07	4.01439e+07	1.81932e+07	1.74294e+07	1.928e+07	1.05576e+06	2.34556e+07	2.7222e+07
Com_387_neg	Methylmalonic acid	C4 H6 O4	118.026	1.355	1.71152e+08	6.50511e+07	7.81883e+07	2.30041e+08	1.42538e+08	1.60819e+08	1.74457e+07	7.97388e+07	5.75662e+07	5.20963e+07	5.07178e+07	4.03786e+07	2.74161e+09	2.24936e+09	2.20672e+09	2.33024e+09	1.80566e+09	4.90686e+08
Com_1608_neg	Dodecanedioic acid	C12 H22 O4	230.152	7.912	2.37519e+08	1.27364e+08	1.27041e+08	5.21936e+07	5.91439e+07	2.32938e+08	1.11299e+07	2.44876e+07	2.78687e+07	1.48641e+07	3.35648e+07	1.85111e+07	5.14317e+06	5.88784e+06	6.39647e+06	6.70107e+06	4.90335e+06	5.08276e+06
Com_3849_pos	6 β-Hydroxycortisol	C21 H30 O6	378.204	10.189	1.64754e+08	1.31267e+08	9.80955e+07	8.52314e+07	1.691e+08	1.00785e+08	9.64299e+07	8.81395e+07	4.84023e+07	8.11999e+07	8.39526e+07	8.99604e+07	4.44742e+07	6.19838e+07	6.96263e+07	5.94881e+07	4.67445e+07	5.46596e+07
Com_835_neg	Dimethyl fumarate	C6 H8 O4	144.042	1.428	1.20851e+08	8.31391e+07	9.93612e+07	1.13282e+08	1.26756e+08	1.52236e+08	3.30864e+07	4.23429e+07	2.97568e+07	8.65243e+07	4.21278e+07	3.8369e+07	6.7666e+08	6.50306e+08	6.17774e+08	5.34713e+08	5.85511e+08	4.41053e+08
Com_4026_pos	11β-Hydroxyandrosterone	C19 H30 O3	306.219	9.524	1.17404e+08	1.24261e+08	9.46428e+07	8.97176e+07	9.24542e+07	1.15007e+08	5.3e+07	5.73368e+07	3.28302e+07	4.21624e+07	6.92846e+07	4.07975e+07	6.23314e+07	7.21598e+07	6.17861e+07	6.93765e+07	5.66572e+07	6.18103e+07
Com_145_neg	3-Hydroxybutyric acid	C4 H8 O3	104.047	1.438	9.3027e+07	9.16755e+07	8.40046e+07	7.57898e+07	5.45313e+07	2.32255e+08	4.70125e+08	4.59851e+08	4.32435e+08	2.6621e+08	4.44692e+08	4.84809e+08	7.46464e+09	9.19874e+09	6.57032e+09	8.38635e+09	6.76576e+09	6.50637e+09
Com_3928_pos	Gamma-Caprolactone	C6 H10 O2	114.068	6.529	1.0816e+08	7.86319e+07	1.04507e+08	8.28923e+07	9.30826e+07	1.46783e+08	2.40616e+07	3.96229e+07	3.83148e+07	4.23832e+07	3.95347e+07	4.73803e+07	5.21467e+07	6.34565e+07	4.937e+07	4.73009e+07	5.60018e+07	3.7352e+07
Com_4761_pos	Carvone	C10 H14 O	150.104	11.052	1.06131e+08	8.02562e+07	9.52552e+07	6.72465e+07	1.46765e+08	9.83988e+07	3.52303e+07	4.88019e+07	3.58026e+07	4.15882e+07	5.02141e+07	4.17675e+07	5.40409e+07	7.96611e+07	6.41346e+07	5.52816e+07	5.37647e+07	5.67693e+07
Com_1414_neg	Thymidine	C10 H14 N2 O5	242.09	5.521	1.12078e+08	1.10025e+08	1.37752e+08	8.06369e+07	5.494e+07	9.83765e+07	7.14648e+07	5.26907e+07	7.87365e+07	7.93754e+07	7.50518e+07	4.94132e+07	2.66356e+07	3.01249e+07	5.00278e+07	1.31996e+07	1.37949e+07	4.88346e+06
Com_4436_pos	Dehydroepiandrosterone	C19 H28 O2	288.209	9.522	1.04616e+08	1.14115e+08	8.50213e+07	8.1907e+07	8.49178e+07	1.07591e+08	5.05137e+07	5.57143e+07	3.02086e+07	3.87307e+07	6.93996e+07	3.99123e+07	6.54786e+07	6.7907e+07	6.08825e+07	6.63305e+07	6.46728e+07	5.80694e+07
Com_3405_pos	Phosphoethanolamine	C2 H8 N O4 P	141.019	14.145	1.18327e+08	6.42378e+07	1.02899e+08	7.89681e+07	9.01809e+07	1.05124e+08	9.4856e+06	1.29908e+07	1.97955e+07	1.63415e+07	2.08348e+07	1.77475e+07	2.34916e+07	2.65982e+07	2.63879e+07	3.73602e+07	2.41649e+07	3.46961e+07
Com_4558_pos	N-Ethylglycine	C4 H9 N O2	103.063	1.504	8.89717e+07	7.75281e+07	1.01102e+08	8.00259e+07	7.484e+07	9.53784e+07	7.49652e+07	3.69711e+07	5.51132e+07	6.23468e+07	4.78198e+07	4.71861e+07	3.16478e+07	3.50898e+07	3.7085e+07	3.62109e+07	3.03208e+07	2.23863e+07
Com_4933_pos	Cafestol	C20 H28 O3	316.204	10.652	7.13425e+07	8.77147e+07	8.0341e+07	5.12278e+07	9.16839e+07	1.29123e+08	4.07865e+07	2.92608e+07	2.46756e+07	2.57921e+07	3.49912e+07	2.96723e+07	5.36871e+07	5.56857e+07	5.80048e+07	5.6063e+07	5.27794e+07	5.25592e+07
Com_2526_neg	Tetrahydrocorticosterone	C21 H34 O4	350.246	11.997	6.04399e+07	5.48165e+07	2.91052e+07	1.14853e+08	1.50088e+08	5.03888e+07	1.40929e+07	2.3526e+07	7.39492e+06	2.00563e+07	1.82906e+07	1.89063e+07	2.86822e+06	7.56499e+06	4.42588e+06	5.68503e+06	5.29072e+06	8.61504e+06
Com_1657_pos	Adenine	C5 H5 N5	135.055	1.36	8.74857e+07	1.04187e+08	4.8881e+07	7.67667e+07	5.55387e+07	4.41933e+07	2.54375e+08	1.0103e+08	4.72154e+08	2.76696e+08	1.65744e+08	1.51943e+08	1.88675e+07	4.21481e+07	4.17319e+07	2.04625e+07	2.6015e+07	2.54705e+07
Com_2098_neg	Pregnenolone	C21 H32 O2	316.242	13.667	6.58518e+07	4.65406e+07	5.84003e+07	9.32239e+07	6.15873e+07	6.04314e+07	6.55765e+07	7.76968e+07	1.53419e+08	1.16681e+08	1.21335e+08	9.70616e+07	5.03487e+06	3.64872e+06	9.46783e+06	3.48288e+06	1.506e+07	3.07632e+07
Com_2983_neg	Ursolic acid	C30 H48 O3	456.36	14.05	6.7995e+07	7.42894e+07	5.81752e+07	4.28448e+07	5.76747e+07	7.82501e+07	1.78527e+07	3.52671e+07	1.61771e+07	6.47876e+06	2.30053e+07	1.10751e+07	6.50196e+06	7.69406e+06	8.98693e+06	1.02386e+07	5.65484e+06	1.21688e+07
Com_3031_neg	Methyl-beta-galactopyranoside	C7 H14 O6	194.079	1.262	6.47625e+07	7.23973e+07	6.50251e+07	4.66513e+07	4.858e+07	7.32285e+07	3.37055e+07	3.52689e+07	4.21045e+07	3.03257e+07	2.99957e+07	4.7387e+07	1.72194e+08	1.47033e+08	1.49021e+08	1.65205e+08	2.25765e+08	9.72331e+07
Com_1458_neg	N-Acetylornithine	C7 H14 N2 O3	174.1	1.375	5.90136e+07	7.94857e+07	5.99237e+07	4.12962e+07	4.69399e+07	8.07637e+07	1.27045e+08	8.96899e+07	1.09182e+08	7.62508e+07	9.05329e+07	9.46893e+07	2.22004e+08	2.16279e+08	1.67713e+08	2.54907e+08	1.68626e+08	1.10603e+08
Com_4020_neg	Prostaglandin E1	C20 H34 O5	354.24	11.518	5.35854e+07	7.21169e+07	4.12776e+07	5.45878e+07	6.15925e+07	5.45975e+07	2.41049e+07	2.39469e+07	2.56741e+07	2.5722e+07	2.68486e+07	2.98739e+07	1.64556e+07	1.98673e+07	2.14787e+07	1.93247e+07	2.06602e+07	1.51952e+07
Com_6556_pos	Skatole	C9 H9 N	131.073	6.556	6.14651e+07	6.528e+07	7.53598e+07	5.45984e+07	4.24598e+07	3.35771e+07	2.48922e+07	3.83654e+07	2.9436e+07	2.26584e+07	2.22333e+07	2.45571e+07	1.68355e+07	1.49311e+07	1.45083e+07	1.62405e+07	1.17179e+07	9.61419e+06
Com_1585_pos	17α-Ethynylestradiol	C20 H24 O2	296.173	8.157	5.40493e+07	1.0874e+08	5.05412e+07	4.3411e+07	2.63961e+07	4.58081e+07	2.02626e+08	1.44352e+08	1.78371e+08	2.10856e+08	1.05661e+08	6.78163e+07	1.85622e+07	1.37437e+07	1.0935e+07	1.05997e+07	1.73874e+07	4.89742e+06
Com_8129_pos	Prostaglandin B2	C20 H30 O4	334.214	9.423	4.56628e+07	6.10978e+07	4.64444e+07	3.65369e+07	6.17985e+07	5.68053e+07	1.83004e+07	1.97454e+07	1.01857e+07	2.69509e+06	1.27604e+07	1.41125e+07	2.83475e+07	4.271e+07	2.60008e+07	2.10035e+07	3.29608e+07	2.41492e+07
Com_1656_neg	2-Methylsuccinic Acid	C5 H8 O4	132.042	1.446	4.91445e+07	6.36895e+07	4.02402e+07	4.26249e+07	5.07418e+07	5.58656e+07	3.19879e+07	3.73237e+07	3.61309e+07	2.84811e+07	4.13957e+07	4.77628e+07	2.56469e+08	3.40531e+08	2.09453e+08	1.81128e+08	2.57611e+08	1.4228e+08
Com_3835_neg	Prostaglandin B1	C20 H32 O4	336.23	10.217	3.81468e+07	1.05965e+08	2.50206e+07	2.89191e+07	6.54691e+07	3.32391e+07	8.84588e+06	1.18985e+07	1.18119e+07	1.06633e+07	9.3404e+06	5.54925e+06	5.74366e+06	8.30404e+06	5.72698e+06	8.01687e+06	5.34115e+06	6.07398e+06
Com_694_pos	Maltotetraose	C24 H42 O21	666.221	1.341	1.86594e+07	1.82806e+07	2.94508e+07	1.8453e+07	1.89974e+07	1.83133e+08	1.7731e+08	5.11592e+08	3.46028e+08	2.01279e+08	4.26328e+08	6.33142e+08	1.69501e+09	1.05144e+09	1.33154e+09	1.10364e+09	9.86435e+08	1.00306e+09
Com_423_pos	Maltitol	C12 H24 O11	344.132	1.282	2.52205e+07	3.46964e+07	2.05782e+07	2.76294e+07	3.03014e+07	1.44432e+08	2.27646e+08	4.46685e+08	2.84449e+08	1.30355e+08	3.00231e+08	5.35306e+08	2.98507e+09	2.46865e+09	2.70877e+09	2.65041e+09	2.24195e+09	1.57114e+09
Com_3783_neg	Dl-Lanthionine	C6 H12 N2 O4 S	208.052	1.176	2.61667e+07	2.90637e+07	4.60344e+07	5.67533e+07	8.84186e+07	3.09652e+07	1.07133e+07	1.93593e+07	1.85686e+07	1.43408e+07	1.02045e+07	9.7648e+06	4.64343e+06	5.70881e+06	3.65275e+06	3.81262e+06	5.03678e+06	6.88598e+06
Com_6956_pos	N-Acetylcaprolactam	C8 H13 N O2	155.095	9.8	4.55726e+07	7.08225e+07	2.82059e+07	6.67332e+07	3.01251e+07	3.28824e+07	2.8444e+07	3.14211e+07	2.76445e+07	2.68451e+07	1.86923e+07	2.12448e+07	1.05928e+07	1.03536e+07	1.15472e+07	8.84323e+06	1.03962e+07	7.61721e+06
Com_8714_pos	Epinephrine	C9 H13 N O3	183.09	8.687	3.5276e+07	3.48462e+07	4.0233e+07	6.43973e+07	4.18075e+07	4.05174e+07	1.16826e+07	1.45972e+07	2.24978e+07	3.0801e+07	2.46108e+07	1.67583e+07	1.44567e+07	1.27523e+07	1.19058e+07	1.46193e+07	1.33358e+07	1.25428e+07
Com_225_neg	D-Raffinose	C18 H32 O16	504.17	1.371	1.05653e+07	2.26172e+07	4.86643e+07	1.45882e+07	1.12945e+07	1.36992e+08	1.97859e+08	2.84744e+08	1.34409e+08	7.63644e+07	1.43399e+08	3.78167e+08	4.80908e+09	5.49897e+09	4.87506e+09	4.38621e+09	4.56409e+09	3.73029e+09
Com_4497_neg	5-Methyluridine	C10 H14 N2 O6	258.085	1.158	3.42762e+07	2.6367e+07	3.65046e+07	6.77703e+07	3.00481e+07	3.26334e+07	1.16625e+07	2.95802e+07	2.34701e+07	6.75516e+06	9.32322e+06	1.76554e+07	4.04917e+06	2.93916e+06	3.12089e+06	4.04325e+06	5.21209e+06	3.46985e+06
Com_9861_pos	Guggulsterone	C21 H28 O2	312.209	8.713	4.60086e+07	3.75993e+07	3.10727e+07	2.90472e+07	4.42435e+07	3.57167e+07	1.67691e+07	2.12238e+07	1.02438e+07	8.37465e+06	1.29278e+07	1.5823e+07	1.51496e+07	2.94571e+07	2.59747e+07	1.73779e+07	2.18772e+07	1.90536e+07
Com_7616_pos	Methyl indole-3-acetate	C11 H11 N O2	189.079	10.29	2.51409e+07	8.29957e+07	2.54739e+07	2.59767e+07	2.97084e+07	3.23454e+07	1.76706e+07	2.76017e+07	1.93833e+07	2.04753e+07	1.46698e+07	3.00144e+07	3.51854e+07	3.8979e+07	3.60561e+07	3.32894e+07	2.73764e+07	1.70696e+07
Com_855_pos	Medroxyprogesterone	C22 H32 O3	344.235	11.92	3.56308e+07	2.57396e+07	3.83606e+07	2.4377e+07	4.43233e+07	3.95202e+07	1.00632e+08	6.17396e+07	5.7084e+07	9.6529e+07	5.56355e+07	4.45378e+07	3.21967e+08	1.08626e+09	9.04938e+08	7.73198e+08	6.4609e+08	1.28194e+09
Com_7258_pos	Cytosine	C4 H5 N3 O	111.043	1.35	2.61407e+07	3.96694e+07	2.97581e+07	2.78647e+07	3.46433e+07	2.97459e+07	3.7621e+07	3.55803e+07	6.87876e+07	5.25473e+07	3.34533e+07	4.32313e+07	8.9092e+06	1.06658e+07	2.07124e+07	7.11796e+06	1.5888e+07	7.81979e+06
Com_4749_neg	Imidazoleacetic acid	C5 H6 N2 O2	126.043	5.482	3.69139e+07	3.27773e+07	3.92949e+07	2.55494e+07	2.00272e+07	3.23169e+07	1.87265e+07	2.57655e+07	2.26397e+07	2.17137e+07	1.67337e+07	1.64399e+07	1.49187e+07	1.78813e+07	1.95709e+07	1.4723e+07	1.66251e+07	9.05563e+06
Com_3739_neg	Indole-3-lactic acid	C11 H11 N O3	205.074	5.928	1.97886e+07	3.72818e+07	2.0645e+07	4.40683e+07	3.51159e+07	2.97988e+07	2.69956e+07	1.48531e+07	1.6637e+07	1.1961e+07	8.67404e+06	8.28402e+06	8.51873e+06	1.24148e+07	1.2391e+07	5.81163e+07	1.85578e+07	9.22686e+06
Com_10171_pos	Apocynin	C9 H10 O3	166.063	8.851	2.9259e+07	2.64126e+07	1.90362e+07	2.60272e+07	4.54091e+07	2.96594e+07	8.76912e+06	9.86882e+06	1.52965e+07	1.43694e+07	1.39637e+07	1.52945e+07	1.401e+07	1.89395e+07	1.67163e+07	1.56168e+07	2.49333e+07	1.79686e+07
Com_3651_pos	Trigonelline	C7 H7 N O2	137.048	7.377	2.46076e+07	3.18259e+07	2.85823e+07	2.58287e+07	2.25963e+07	3.20922e+07	1.33678e+07	1.93479e+07	2.04898e+07	1.34711e+07	2.14189e+07	2.59281e+07	6.65745e+07	1.09467e+08	2.51273e+08	1.44488e+08	8.9665e+07	8.24272e+07
Com_8616_pos	Coumarin	C9 H6 O2	146.037	8.718	3.30791e+07	2.85869e+07	2.92829e+07	2.64453e+07	3.15692e+07	1.62224e+07	5.84357e+06	8.82589e+06	2.16768e+07	2.50804e+07	2.13007e+07	1.00423e+07	4.70894e+06	5.56404e+06	5.16898e+06	5.1534e+06	6.47805e+06	4.87972e+06
Com_10601_pos	L-Homocitrulline	C7 H15 N3 O3	189.111	1.549	3.21269e+07	1.22513e+07	2.86253e+07	2.04919e+07	3.093e+07	3.06835e+07	2.05413e+07	1.39907e+07	1.121e+07	2.40244e+07	1.97154e+07	9.05625e+06	5.13596e+07	5.55456e+07	4.78181e+07	4.74812e+07	3.56437e+07	3.12025e+07
Com_13327_pos	Desoxycortone	C21 H30 O3	330.223	13.933	1.76183e+07	3.63939e+07	2.25321e+07	2.20039e+07	2.96195e+07	1.68402e+07	1.31782e+07	1.43475e+07	1.14745e+07	1.29764e+07	1.17547e+07	8.61829e+06	7.7344e+06	9.05705e+06	9.43391e+06	8.38034e+06	7.35442e+06	1.08333e+07
Com_13297_pos	Cytidine-5-Monophosphate	C9 H14 N3 O8 P	323.051	8.349	2.29087e+07	2.36422e+07	1.77445e+07	1.81325e+07	2.17953e+07	2.63804e+07	1.47756e+07	1.01232e+07	8.37385e+06	1.14846e+07	1.30871e+07	1.21062e+07	2.7443e+07	3.93828e+07	3.70338e+07	3.50031e+07	3.01662e+07	2.98617e+07
Com_249_neg	Lactitol	C12 H24 O11	344.132	1.296	3.65051e+06	7.30003e+06	4.70864e+06	2.86458e+06	4.25429e+06	1.06119e+08	2.05118e+08	3.86292e+08	1.94937e+08	1.22106e+08	2.10228e+08	4.18959e+08	3.65094e+09	4.97657e+09	4.29522e+09	4.02513e+09	2.93187e+09	2.61209e+09
Com_6954_neg	Tetradecanedioic acid	C14 H26 O4	258.183	9.756	1.77087e+07	2.98357e+07	1.49963e+07	2.05002e+07	2.08021e+07	2.32033e+07	1.3933e+07	1.88892e+07	1.1473e+07	1.06597e+07	1.35159e+07	7.60316e+06	3.47064e+06	3.1541e+06	4.55882e+06	5.02213e+06	3.96705e+06	3.53691e+06
Com_7476_neg	2'-Deoxyuridine	C9 H12 N2 O5	228.074	8.034	1.45762e+07	3.7364e+07	1.56196e+07	1.90371e+07	1.61135e+07	1.47381e+07	4.26612e+06	7.43435e+06	1.10164e+07	7.12001e+06	1.11124e+07	6.87714e+06	3.52774e+06	4.08495e+06	3.85807e+06	6.05425e+06	4.08192e+06	3.65728e+06
Com_2672_neg	DL-Malic acid	C4 H6 O5	134.021	1.255	3.91841e+07	2.20992e+07	7.04961e+06	1.65363e+07	1.38337e+07	1.85391e+07	4.32922e+06	6.84616e+06	8.423e+06	5.73219e+06	6.74704e+06	1.05378e+07	1.81651e+08	1.31984e+08	1.24107e+08	1.15024e+08	2.67516e+08	6.08947e+07
Com_1587_pos	Maltopentaose	C30 H52 O26	828.273	1.344	4.34777e+06	6.22816e+06	1.36701e+07	6.40109e+06	4.64648e+06	7.90183e+07	1.73284e+07	2.03124e+08	1.95732e+08	1.35736e+08	2.03537e+08	2.43438e+08	6.25009e+08	3.12463e+08	3.16706e+08	4.38716e+08	3.00608e+08	2.22314e+08
Com_15961_pos	Epitestosterone	C19 H28 O2	288.209	14.494	1.40527e+07	1.9054e+07	2.00484e+07	1.58359e+07	2.23887e+07	2.10106e+07	1.21634e+07	1.283e+07	9.99664e+06	9.15219e+06	1.30446e+07	1.03026e+07	7.20923e+06	1.08556e+07	9.69043e+06	8.47045e+06	5.41612e+06	7.97211e+06
Com_8898_neg	Enterodiol	C18 H22 O4	302.153	9.733	1.51285e+07	2.37998e+07	1.12673e+07	1.93125e+07	2.08363e+07	1.75533e+07	1.11687e+07	1.2089e+07	1.03545e+07	7.28196e+06	8.95871e+06	9.88057e+06	1.19352e+07	1.5004e+07	1.26719e+07	1.28909e+07	1.42884e+07	1.42947e+07
Com_15972_pos	4-Hydroxyphenylacetic acid	C8 H8 O3	152.047	9.506	1.69417e+07	1.60491e+07	1.59098e+07	1.19546e+07	1.83827e+07	1.8623e+07	7.7615e+06	1.06218e+07	1.14186e+07	1.11838e+07	1.73057e+07	1.30644e+07	2.38434e+07	2.93718e+07	2.62982e+07	2.33002e+07	2.22133e+07	1.8754e+07
Com_9235_neg	7-Methyluric Acid	C6 H6 N4 O3	182.044	1.383	2.21873e+07	1.66845e+07	1.42353e+07	1.24247e+07	1.34884e+07	1.49445e+07	9.4414e+06	7.45858e+06	1.14177e+07	9.52788e+06	6.69388e+06	8.23244e+06	6.24932e+06	4.79484e+06	3.77495e+06	6.28209e+06	9.14504e+06	6.66784e+06
Com_6630_neg	Lipoic acid	C8 H14 O2 S2	206.043	1.076	2.3817e+07	1.66117e+07	1.50246e+07	6.91374e+06	1.47537e+07	1.63328e+07	1.73614e+07	6.43941e+07	3.55424e+07	2.41599e+07	4.69728e+07	2.0098e+07	1.95653e+06	4.72729e+06	4.35095e+06	3.68918e+06	5.53935e+06	4.22134e+06
Com_7641_pos	Argininosuccinic acid	C10 H18 N4 O6	290.122	1.346	1.95897e+07	2.58143e+07	1.75679e+07	1.40993e+07	4.67884e+06	1.02924e+07	2.89453e+07	3.99674e+07	4.75925e+07	4.04885e+07	1.93529e+07	3.05284e+07	8.72803e+06	8.10769e+06	5.30284e+06	6.73823e+06	7.30294e+06	4.84646e+06
Com_6547_neg	12-Hydroxydodecanoic acid	C12 H24 O3	216.172	12.114	1.11907e+07	1.86338e+07	9.55912e+06	1.90411e+07	1.46042e+07	1.52598e+07	1.81635e+07	2.14603e+07	2.1016e+07	1.51439e+07	1.99435e+07	2.10374e+07	2.4791e+07	3.29073e+07	2.77146e+07	3.15543e+07	2.53601e+07	2.01269e+07
Com_10177_neg	L-Cysteinesulfinic acid	C3 H7 N O4 S	153.009	1.241	1.25632e+07	7.47983e+06	1.1966e+07	1.11447e+07	1.76486e+07	9.61561e+06	5.73098e+06	6.90852e+06	6.22939e+06	1.36365e+07	6.81975e+06	5.29037e+06	2.56776e+06	2.82598e+06	2.83497e+06	3.5684e+06	8.15839e+06	3.40644e+06
Com_667_neg	Maltotriose	C18 H32 O16	564.191	1.36	3.74186e+06	7.42103e+06	1.64431e+07	3.5749e+06	2.81696e+06	2.69084e+07	5.21857e+07	8.60172e+07	2.96193e+07	1.91568e+07	3.68188e+07	1.21307e+08	1.29242e+09	7.15778e+08	1.22753e+09	3.98021e+08	1.19519e+09	8.40318e+08
Com_10265_neg	beta hydroxybutyrate	C4 H8 O3	104.047	9.152	9.03313e+06	1.14607e+07	1.12218e+07	6.73446e+06	9.58476e+06	1.20905e+07	2.6663e+06	4.92754e+06	4.69096e+06	5.34274e+06	6.0326e+06	4.7876e+06	6.29804e+06	6.65164e+06	6.58135e+06	6.38046e+06	7.8726e+06	5.01831e+06
Com_5164_neg	Hydroquinone	C6 H6 O2	110.037	1.426	7.53374e+06	1.08943e+07	8.39994e+06	7.37934e+06	1.0255e+07	8.4603e+06	6.53274e+06	6.08962e+06	8.26402e+06	5.00467e+06	5.48825e+06	7.29405e+06	3.39535e+07	3.03124e+07	3.03101e+07	2.65452e+07	2.63308e+07	2.67326e+07
Com_12991_neg	P-Aminobenzoate	C7 H7 N O2	137.048	9.136	5.39706e+06	7.23657e+06	8.49313e+06	1.29414e+07	9.24938e+06	9.25838e+06	3.98511e+06	4.80498e+06	5.20185e+06	5.53832e+06	6.67881e+06	5.25468e+06	6.29559e+06	6.068e+06	6.66208e+06	6.627e+06	6.71203e+06	5.93316e+06
Com_12607_pos	Camptothecin	C20 H16 N2 O4	348.11	5.263	4.8628e+06	5.43589e+06	8.53976e+06	8.54007e+06	1.18779e+07	1.01564e+07	9.74022e+06	7.91184e+06	1.7121e+07	9.92365e+06	1.51332e+07	1.50644e+07	2.15711e+07	1.67402e+07	2.07983e+07	4.07262e+07	2.5036e+07	3.17901e+07
Com_27481_pos	Etiocholanolone	C19 H30 O2	272.214	15.202	6.03434e+06	6.24978e+06	7.41192e+06	8.16176e+06	9.0066e+06	6.3194e+06	3.42247e+06	5.81905e+06	4.97114e+06	5.36609e+06	6.24027e+06	4.49756e+06	2.71562e+06	3.24177e+06	3.26192e+06	2.99903e+06	3.5008e+06	4.65111e+06
Com_16153_neg	Phenylpyruvic Acid	C9 H8 O3	164.047	1.16	5.99138e+06	7.89137e+06	3.714e+06	8.0397e+06	6.48611e+06	6.52231e+06	2.12286e+06	3.6619e+06	4.71886e+06	2.4172e+06	3.60493e+06	3.24858e+06	4.34582e+06	4.78369e+06	4.08404e+06	3.92832e+06	4.19471e+06	4.05864e+06
Com_29786_pos	Estradiol	C18 H24 O2	272.176	12.189	5.88206e+06	7.46277e+06	4.66542e+06	4.67981e+06	6.4088e+06	6.02188e+06	4.31072e+06	4.54504e+06	2.86881e+06	3.43834e+06	3.9743e+06	3.89552e+06	3.16079e+06	3.68407e+06	3.38859e+06	3.05385e+06	2.73712e+06	2.53649e+06
Com_6339_pos	Paracetamol	C8 H9 N O2	151.063	7.192	4.75631e+06	7.12584e+06	4.44419e+06	6.13504e+06	6.07734e+06	4.76545e+06	3.62451e+06	3.53959e+06	5.20517e+06	4.37877e+06	3.80182e+06	4.76832e+06	8.98103e+06	6.98332e+06	6.59875e+06	5.78855e+06	6.89007e+06	7.00826e+06
Com_14486_neg	Testosterone	C19 H28 O2	288.209	13.346	4.80887e+06	5.06458e+06	6.91843e+06	3.52378e+06	5.07465e+06	5.44764e+06	2.02521e+06	2.7331e+06	2.13582e+06	2.59907e+06	3.05016e+06	1.9721e+06	882918	628013	851344	698566	1.02057e+06	880510
Com_5906_neg	Dl-Indole-3-lactic acid	C11 H11 N O3	205.074	1.381	3.61518e+06	4.23725e+06	3.66811e+06	3.64819e+06	2.3069e+06	6.35704e+06	1.77866e+07	1.68547e+07	9.09471e+06	8.86466e+06	4.53684e+06	1.02765e+07	3.49568e+07	2.55502e+07	2.9055e+07	2.72937e+07	8.3029e+07	1.21058e+07
Com_19179_neg	Hydroxypyruvic acid	C3 H4 O4	104.011	1.101	3.91283e+06	3.64872e+06	2.65258e+06	3.78029e+06	3.62885e+06	3.32308e+06	931830	1.30688e+06	1.72019e+06	2.72648e+06	1.96609e+06	1.41481e+06	6.62095e+06	6.90629e+06	5.90657e+06	7.01787e+06	8.56513e+06	4.52885e+06
Com_39098_pos	Taurochenodeoxycholate	C26 H44 N Na O6 S	521.279	7.115	2.78448e+06	4.4039e+06	1.67523e+06	3.50479e+06	3.20954e+06	2.59834e+06	674216	769686	877518	689041	661715	993162	768735	1.41723e+06	1.46202e+06	1.85485e+06	856663	1.15918e+06
Com_11069_neg	L-Cystathionine	C7 H14 N2 O4 S	222.067	1.254	3.92922e+06	3.85558e+06	2.54192e+06	1.59077e+06	2.78958e+06	3.27497e+06	6.01087e+06	5.71623e+06	4.6096e+06	3.25369e+06	4.18152e+06	4.47148e+06	2.54813e+07	2.94255e+07	3.01881e+07	1.98087e+07	1.84712e+07	1.27187e+07
Com_21363_pos	Aripiprazole	C23 H27 Cl2 N3 O2	447.144	10.136	3.45681e+06	4.21424e+06	1.95086e+06	1.18087e+06	3.62472e+06	3.2658e+06	9.2118e+06	8.47097e+06	2.53321e+06	5.49444e+06	6.55025e+06	6.26441e+06	1.26279e+07	1.65614e+07	1.4911e+07	1.66496e+07	1.55051e+07	1.26979e+07
Com_12766_neg	Taurocholic Acid	C26 H45 N O7 S	515.293	9.015	520861	164768	8.76448e+06	1.31814e+06	4.21174e+06	1.14282e+06	542840	147693	89422.6	95404.8	79359.8	86702.7	103386	243524	107302	116839	103692	81886.1
Com_5357_neg	L-Ascorbate	C6 H8 O6	176.032	1.009	2.38638e+06	2.73956e+06	1.22123e+06	3.39023e+06	2.45794e+06	2.54734e+06	783063	1.07155e+06	1.2692e+06	2.26847e+06	1.53393e+06	1.19346e+06	2.80797e+07	1.96796e+07	2.81778e+07	2.8897e+07	5.51937e+07	1.37766e+07
Com_17589_neg	Fumaric Acid	C4 H4 O4	116.011	1.265	2.71222e+06	2.83825e+06	2.23831e+06	2.60163e+06	2.08034e+06	2.21001e+06	995300	1.17258e+06	1.812e+06	1.50345e+06	1.32818e+06	1.55323e+06	1.1206e+07	9.13782e+06	7.88643e+06	9.04238e+06	1.46162e+07	5.04399e+06
Com_660_neg	Verbascose	C30 H52 O26	828.276	1.763	783649	1.01742e+06	1.76773e+06	788791	740526	8.86839e+06	3.19429e+07	3.07826e+07	1.85395e+07	1.16074e+07	1.8472e+07	3.31838e+07	8.49886e+08	1.19503e+09	8.63122e+08	1.28183e+09	8.91361e+08	9.12695e+08
Com_3829_pos	α-Cyclodextrin	C36 H60 O30	972.315	5.282	1.39509e+06	1.61012e+06	1.78472e+06	1.38614e+06	1.05023e+06	6.20654e+06	8.93739e+06	1.11522e+07	1.16266e+07	6.31251e+06	9.52813e+06	2.08347e+07	1.67611e+08	2.16522e+08	2.04944e+08	2.10722e+08	1.65641e+08	1.88278e+08
Com_40882_pos	Isobutyryl carnitine	C11 H21 N O4	231.147	9.733	3.11392e+06	2.03862e+06	2.12994e+06	1.86839e+06	2.39426e+06	1.81035e+06	261085	473236	251235	549392	255860	449861	565438	563276	589977	514103	490173	422942
Com_19201_pos	Esculetin	C9 H6 O4	178.026	13.344	1.94054e+06	1.60556e+06	1.97233e+06	1.87285e+06	1.88335e+06	1.72345e+06	1.58553e+06	1.50031e+06	1.37894e+06	1.4931e+06	1.34059e+06	1.41577e+06	1.07542e+06	1.10354e+06	1.12221e+06	993164	983361	1.16281e+06
Com_36664_pos	Isoliquiritigenin	C15 H12 O4	256.072	9.691	1.89069e+06	1.17266e+06	2.05235e+06	843010	1.40996e+06	2.39794e+06	754819	1.05145e+06	690804	703991	760566	752100	3.63864e+06	4.02773e+06	3.40953e+06	3.84903e+06	3.40523e+06	3.67896e+06
Com_19420_pos	Minocycline	C23 H27 N3 O7	457.184	11.969	1.28605e+06	1.36267e+06	1.2813e+06	1.46243e+06	1.3512e+06	1.25097e+06	1.11116e+06	1.32286e+06	1.25146e+06	1.15666e+06	1.04478e+06	1.23099e+06	1.42152e+06	1.53011e+06	1.53918e+06	1.44707e+06	1.70972e+06	1.32625e+06
Com_20700_neg	Soyasaponin I	C48 H78 O18	942.52	12.184	903696	795562	911931	1.09795e+06	1.48188e+06	951058	754467	743646	584149	604637	1.02637e+06	775017	2.55872e+06	2.57004e+06	2.05845e+06	3.04334e+06	1.05989e+06	1.57593e+06
Com_31398_neg	L-Dihydroorotic Acid	C5 H6 N2 O4	158.033	1.265	161079	176037	106854	118285	132616	122089	87965.5	98852.1	94379.2	82908	81121.3	145920	253344	186115	253965	214192	293354	142935
