# Supplementary material for: Modulation of the fecal microbiome and metabolome by resistant dextrin ameliorates hepatic steatosis and mitochondrial abnormalities in mice
Source: Royal Society of Chemistry journal article supplement (doi:10.1039/d1fo00249j), 2021-01-01
Supplement: d1fo00249j2.pdf [file d1fo00249j2.pdf]

**Table S1** Ingredient composition of diets for the ND, HFD and HFID groups.

| Ingredient           | ND   |      | HFD   |        | HFID  |        |
|----------------------|------|------|-------|--------|-------|--------|
|                      | gm   | kcal | gm    | kcal   | gm    | kcal   |
| Casein, 80 Mesh      | 200  | 800  | 200   | 800    | 200   | 800    |
| L-Cystine            | 3    | 12   | 3     | 12     | 3     | 12     |
| Corn Starch          | 315  | 1260 | 72.8  | 291    | 72.8  | 291    |
| Indigestible dextrin | 0    | 0    | 0     | 0      | 87.5  | 175    |
| Maltodextrin 10      | 35   | 140  | 100   | 400    | 56.25 | 225    |
| Sucrose              | 350  | 1400 | 172.8 | 691    | 172.8 | 691    |
| Cellulose, BW200     | 50   | 0    | 50    | 0      | 6.25  | 0      |
| Soybean Oil          | 25   | 225  | 25    | 225    | 25    | 225    |
| Lard                 | 20   | 180  | 177.5 | 1597.5 | 177.5 | 1597.5 |
| Cholesterol          | 0    | 0    | 17.16 | 154.44 | 17.16 | 154.44 |
| Mineral Mix S10026   | 10   | 0    | 10    | 0      | 10    | 0      |
| DiCalcium Phosphate  | 13   | 0    | 13    | 0      | 13    | 0      |
| Calcium Carbonate    | 5.5  | 0    | 5.5   | 0      | 5.5   | 0      |
| Potassium Citrate    | 16.5 | 0    | 16.5  | 0      | 16.5  | 0      |
| Vitamin Mix V10001   | 10   | 40   | 10    | 40     | 10    | 40     |
| Choline Bitartrate   | 2    | 0    | 2     | 0      | 2     | 0      |
| FD&C Yellow Dye #5   | 0.05 | 0    | 0     | 0      | 0     | 0      |
| FD&C Red Dye #40     | 0    | 0    | 0.05  | 0      | 0.05  | 0      |

**Note:** FD&C: A major subsidiary dye in U.S. certified Allura Red AC dye.
